# Supplementary material for: Ligand geometry-driven formation of different coordination polymers from Zn(NO3)2, 1,4-bpeb and phenylenediacetic acids
Source: Royal Society of Chemistry journal article supplement (doi:10.1039/c0ce00575d), 2010-12-06
Supplement: c0ce00575d.pdf [file c0ce00575d.pdf]

## Electronic Supplementary Information (ESI)

### Ligand geometry-driven formation of different coordination polymers from $\text{Zn}(\text{NO}_3)_2$ , 1,4-bpeb and phenylenediacetic acids†

Dong Liu,<sup>a</sup> Yu-Jie Chang,<sup>a</sup> and Jian-Ping Lang<sup>\*a,b</sup>

<sup>a</sup> College of Chemistry, Chemical Engineering and Materials Science, Suzhou University, Suzhou 215123, P. R. China

<sup>b</sup> State Key Laboratory of Coordination Chemistry, Nanjing University, Nanjing 210093, P. R. China

## Table of Contents

|                                                                                                                                                                                                                                                                                                                                                                                                                                                           |    |
|-----------------------------------------------------------------------------------------------------------------------------------------------------------------------------------------------------------------------------------------------------------------------------------------------------------------------------------------------------------------------------------------------------------------------------------------------------------|----|
| <b>Fig. S1</b> (a) Powder XRD patterns of bulk sample of <b>1</b> (down) and Rietveld refinement of model determined by single crystal diffraction (upper); (b) Powder XRD patterns of bulk sample of <b>2</b> (down) and Rietveld refinement of model determined by single crystal diffraction (upper); (c) Powder XRD patterns of bulk sample of <b>3</b> (down) and Rietveld refinement of model determined by single crystal diffraction (upper)..... | S3 |
| <b>Fig. S2</b> PXRD patterns of <b>1</b> and its guest-free form. ....                                                                                                                                                                                                                                                                                                                                                                                    | S5 |
| <b>Fig. S3</b> The TGA curves for <b>1</b> (red), <b>2</b> (blue) and <b>3</b> (black).....                                                                                                                                                                                                                                                                                                                                                               | S6 |

(a)

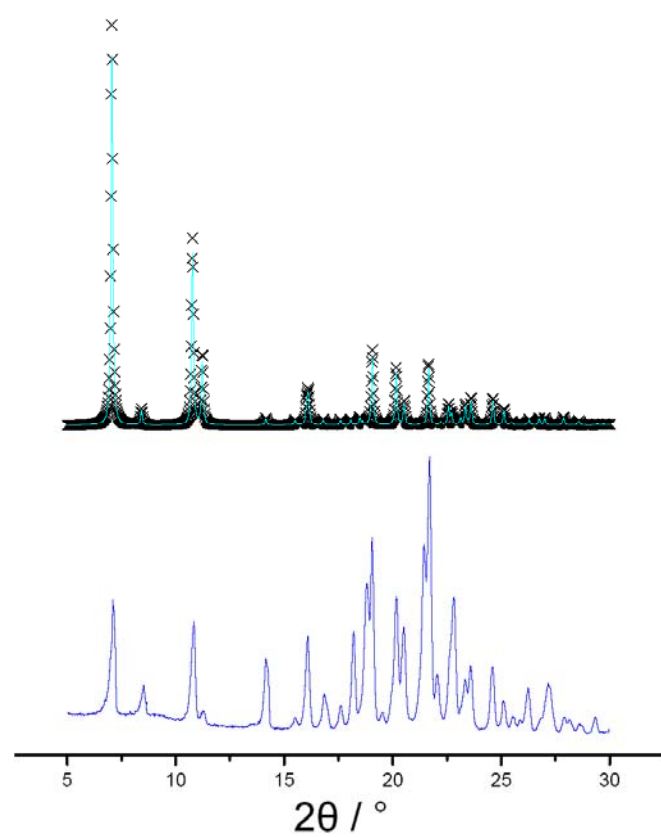

(b)

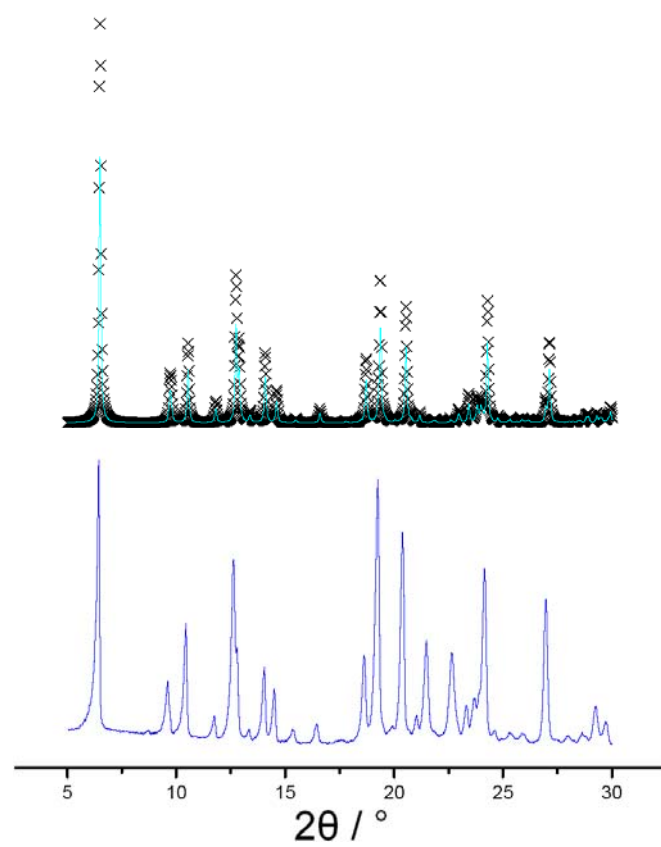

(c)

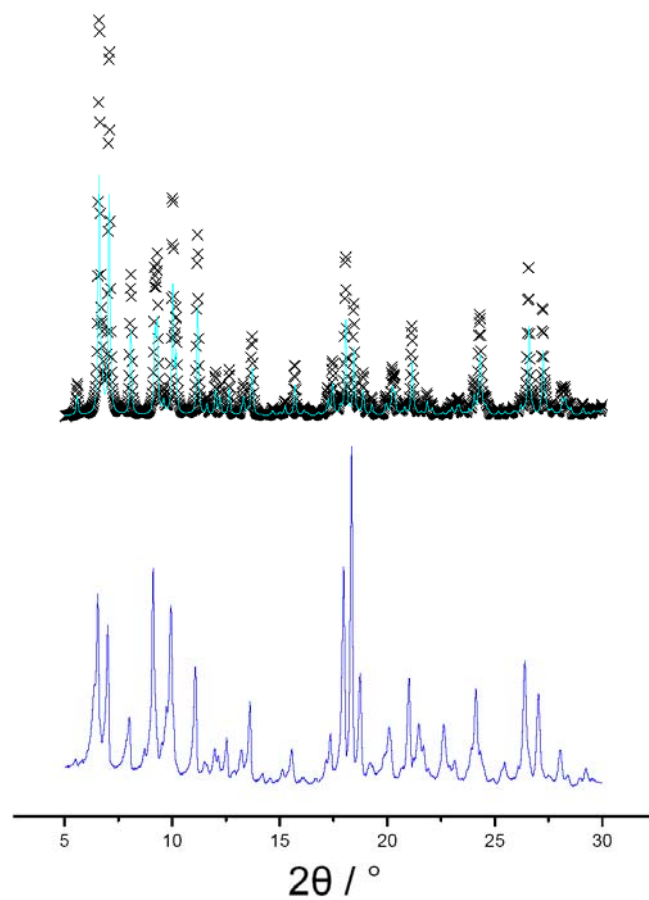

**Fig. S1** (a) Powder XRD patterns of bulk sample of **1** (down) and Rietveld refinement of model determined by single crystal diffraction (upper); (b) Powder XRD patterns of bulk sample of **2** (down) and Rietveld refinement of model determined by single crystal diffraction (upper); (c) Powder XRD patterns of bulk sample of **3** (down) and Rietveld refinement of model determined by single crystal diffraction (upper).

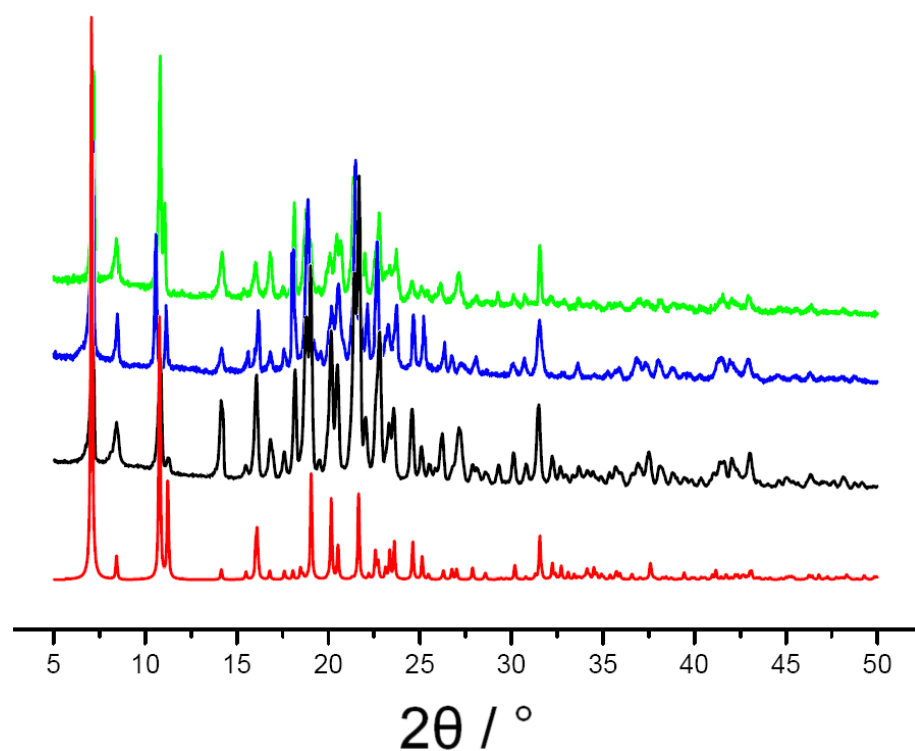

**Fig. S2** Powder XRD patterns of **1** and its guest-free form. Red: simulated from single crystal analysis and experimental; Black: as synthesized; Blue: guest-free form of **1** (by heating at 200°C in air for three hours); Green: guest-free form of **1** (under vacuum for three hours).

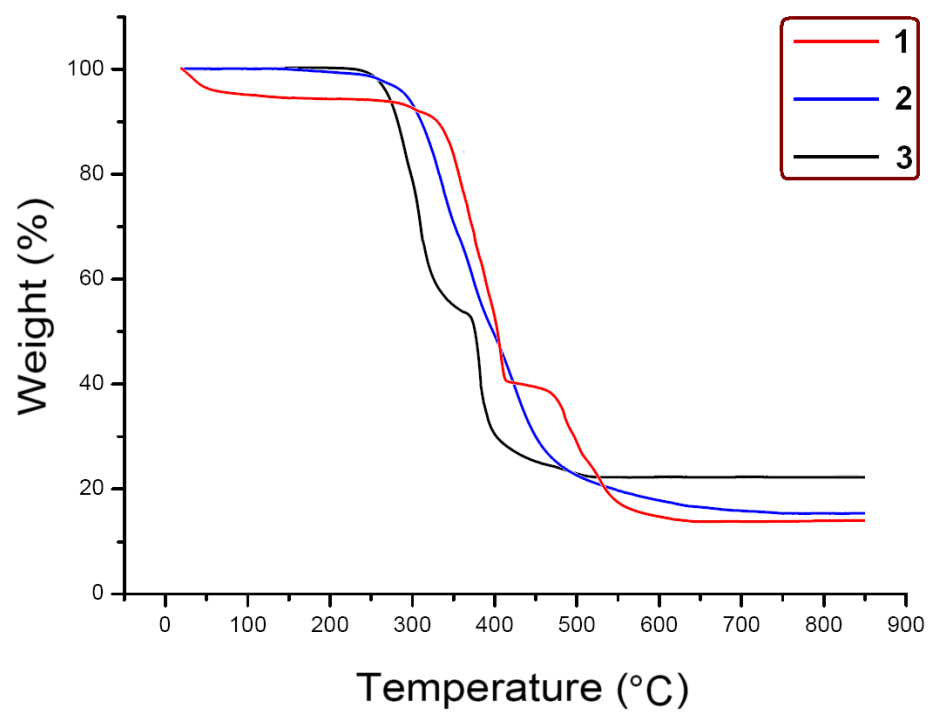

**Fig. S3** The TGA curves for **1** (red), **2** (blue) and **3** (black).
